# Supplementary material for: Efficacy of alemtuzumab over 6 years in relapsing–remitting multiple sclerosis patients who relapsed between courses 1 and 2: Post hoc analysis of the CARE-MS studies
Source: PubMed Central journal article supplement — Mult Scler. 2019 Nov 1;26(13):1719–28. doi: 10.1177/1352458519881759 (PMC7604550; doi:10.1177/1352458519881759), 2019-11-01
Supplement: MSJ881759_supplemental_material.pdf [file MSJ881759_supplemental_material.pdf]

## Supplementary Material

Van Wijmeersch B, Singer BA, Boster A, et al. Efficacy of alemtuzumab over 6 years in relapsing-remitting multiple sclerosis patients who relapsed between Courses 1 and 2: Post hoc analysis of the CARE-MS studies.

- **MRI Methodology.**
- **eFigure 1.** Disposition by subgroup. (A) CARE-MS I patients and (B) CARE-MS II patients.
- **eTable 1.** Early relapsers free of new MRI lesions and achieving annual NEDA through 6 years.
- **eTable 2.** Efficacy outcomes of early non-relapsers and early relapsers through 6 years.

This supplementary material has been provided by the authors to give readers additional information about their work.

### MRI methodology.

Details on the MRI methodology for the CARE-MS I and II core studies and the CARE-MS extension have been described previously.<sup>1-5</sup>

Briefly, standardized cranial MRI scans were obtained at baseline and annually and the following sequences were collected: T1-weighted pre-contrast and post-contrast, T2-weighted and proton density (Dual Echo) pre-contrast, fluid-attenuated inversion recovery (FLAIR) pre-contrast, and 3D Gradient Echo post-contrast. A standard dosage of gadolinium (Gd)-contrast medium was used, with a wait time of 5 minutes before commencing post-contrast T1-weighted scans. Scans were analysed by neuroradiologists at Cleveland Clinic Foundation (for Brain Parenchymal Fraction [BPF]) and NeuroRx Research (for all other imaging endpoints), who were masked to treatment-group assignment.

New MRI lesion outcomes included proportions of early relapsers and early non-relapsers with Gd-enhancing, new/enlarging T2 hyperintense, and new nonenhancing T1 hypointense lesions examined over Years 0–6. Freedom from MRI disease activity was defined as absence of new Gd-enhancing and new/enlarging T2 lesions.

Brain volume loss was measured as changes in the BPF, calculated from proton density/T2-weighted dual-echo images using brain segmentation software developed at the Cleveland Clinic.

### References.

1. Cohen JA, Coles AJ, Arnold DL, et al. Alemtuzumab versus interferon beta 1a as first-line treatment for patients with relapsing-remitting multiple sclerosis: A randomised controlled phase 3 trial. *Lancet* 2012; 380: 1819–1828.
2. Coles AJ, Twyman CL, Arnold DL, et al. Alemtuzumab for patients with relapsing multiple sclerosis after disease-modifying therapy: A randomised controlled phase 3 trial. *Lancet* 2012; 380: 1829–1839.
3. Coles AJ, Cohen JA, Fox EJ, et al. Alemtuzumab CARE-MS II 5-year follow-up: Efficacy and safety findings. *Neurology* 2017; 89: 1117–1126.
4. Havrdova E, Arnold DL, Cohen JA, et al. Alemtuzumab CARE-MS I 5-year follow-up: Durable efficacy in the absence of continuous MS therapy. *Neurology* 2017; 89: 1107–1116.
5. Arnold DL, Fisher E, Brinar VV, et al. Superior MRI outcomes with alemtuzumab compared with subcutaneous interferon b-1a in MS. *Neurology* 2016; 87: 1464–1472.

**eFigure 1.** Disposition by subgroup. (A) CARE-MS I patients and (B) CARE-MS II patients.

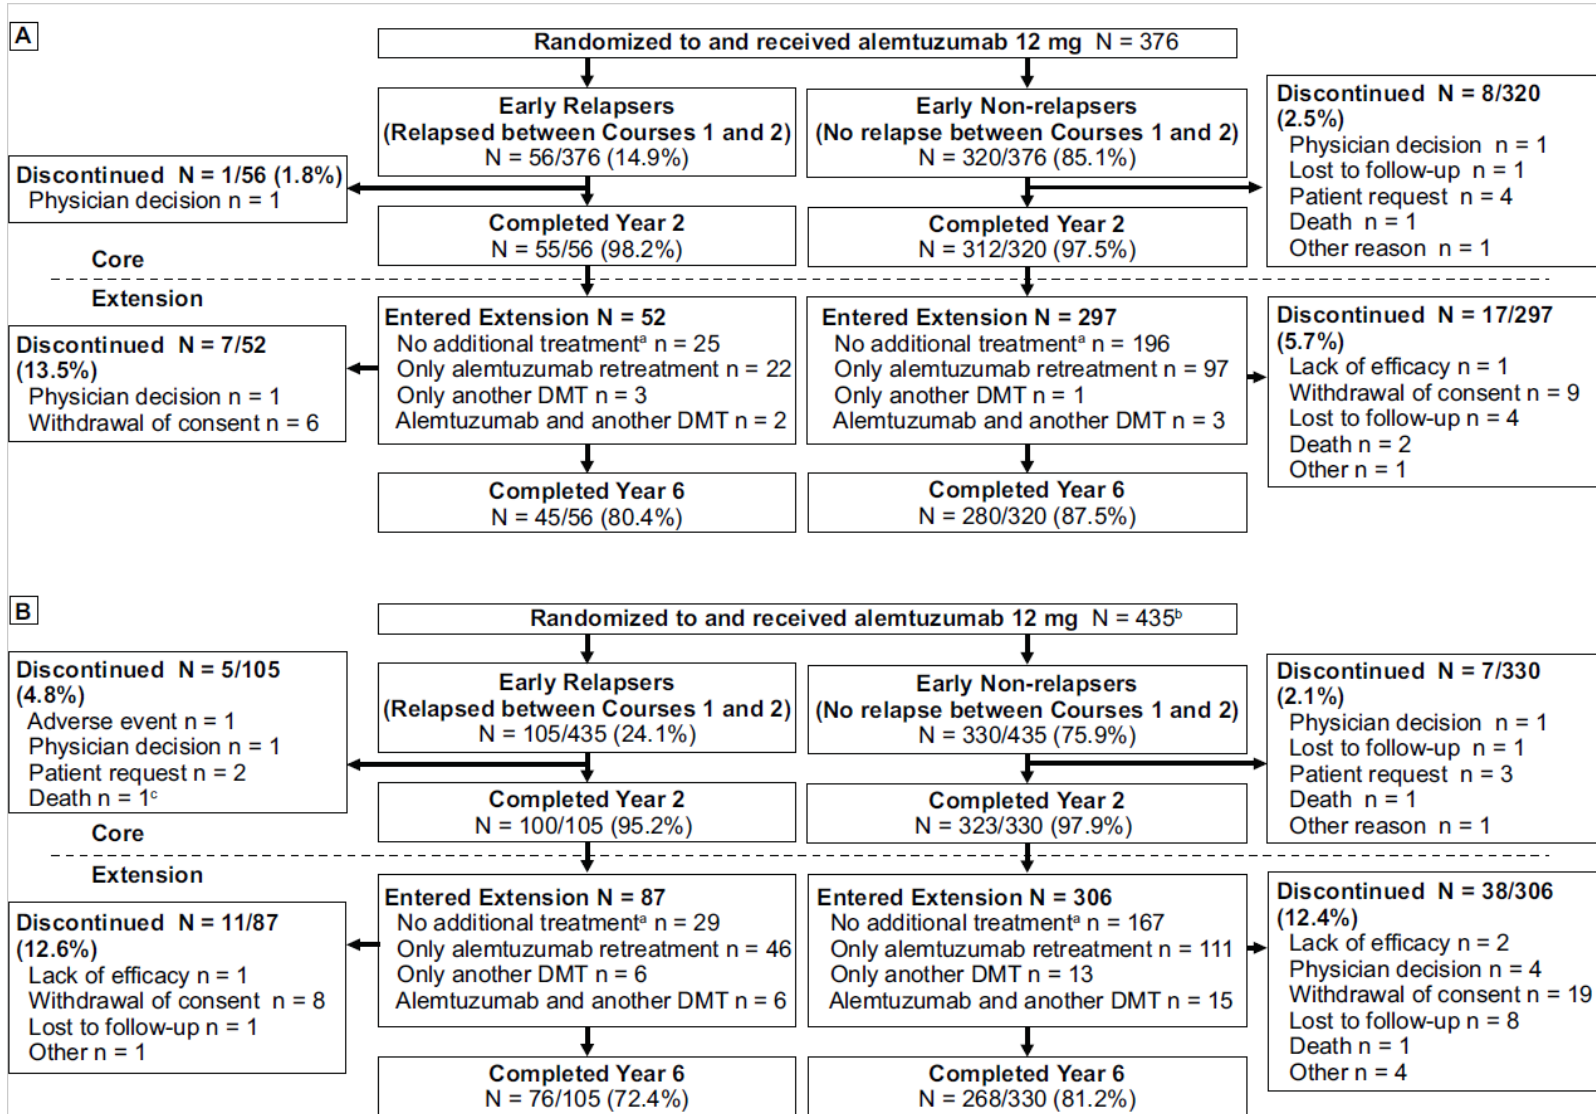

The disposition schematic includes participation of patients with and without relapse between Courses 1 and 2 in the core CARE-MS I (A) or CARE-MS II (B) studies, who enrolled in the extension study. <sup>a</sup>Patients who received no additional alemtuzumab courses or another DMT in the extension study through Year 6. <sup>b</sup>The as-treated CARE-MS II population (n = 435) consisted of 426 patients originally randomized to alemtuzumab 12 mg, and an additional 9 patients who were randomized to alemtuzumab 24 mg but who received alemtuzumab 12 mg/day in the core study. <sup>c</sup>One death of an early relapsing patient occurred in the CARE-MS II core study and was deemed not related to treatment. CARE-MS: Comparison of Alemtuzumab and Rebif Efficacy in Multiple Sclerosis; DMT: disease-modifying therapy.

**eTable 1.** Proportions of early relapsers free of new MRI lesions and achieving NEDA annually through 6 years.

| Annual Assessments <sup>a</sup>                           | CARE-MS I                 |                       |                       |                       |                       |                       | CARE-MS II                 |                       |                       |                       |                       |                       |
|-----------------------------------------------------------|---------------------------|-----------------------|-----------------------|-----------------------|-----------------------|-----------------------|----------------------------|-----------------------|-----------------------|-----------------------|-----------------------|-----------------------|
|                                                           | Early Relapsers<br>(n=56) |                       |                       |                       |                       |                       | Early Relapsers<br>(n=105) |                       |                       |                       |                       |                       |
| MRI Lesion Activity                                       | Year 1                    | Year 2                | Year 3                | Year 4                | Year 5                | Year 6                | Year 1                     | Year 2                | Year 3                | Year 4                | Year 5                | Year 6                |
| Free of Gd-enhancing T1 lesions, % (95% CI)               | 82<br>(72.1,<br>92.2)     | 94<br>(84.3,<br>98.8) | 86<br>(76.4,<br>95.6) | 90<br>(81.3,<br>98.3) | 85<br>(74.9,<br>95.3) | 84<br>(73.3,<br>94.9) | 79<br>(71.6,<br>87.3)      | 86<br>(79.0,<br>92.7) | 81<br>(72.5,<br>90.2) | 89<br>(81.9,<br>96.2) | 93<br>(87.8,<br>99.0) | 94<br>(88.4,<br>99.7) |
| Free of new/enlarging T2 hyperintense lesions, % (95% CI) | 54<br>(40.5,<br>66.6)     | 72<br>(59.6,<br>83.8) | 77<br>(64.5,<br>88.7) | 74<br>(62.0,<br>86.9) | 73<br>(60.4,<br>86.3) | 71<br>(56.8,<br>84.7) | 56<br>(46.7,<br>65.9)      | 71<br>(61.7,<br>79.7) | 64<br>(53.1,<br>74.9) | 71<br>(60.3,<br>81.3) | 72<br>(61.4,<br>81.9) | 68<br>(56.3,<br>79.1) |
| Free of T1 hypointense lesions, % (95% CI)                | 71<br>(59.6,<br>83.3)     | 94<br>(84.3,<br>98.8) | 85<br>(74.9,<br>95.3) | 89<br>(80.5,<br>98.2) | 89<br>(79.7,<br>98.1) | 90<br>(81.2,<br>99.3) | 80<br>(71.8,<br>87.4)      | 88<br>(81.5,<br>94.3) | 85<br>(77.3,<br>93.3) | 85<br>(76.1,<br>92.9) | 86<br>(78.4,<br>94.2) | 89<br>(81.4,<br>96.7) |
| NEDA <sup>b</sup>                                         | Year 1                    | Year 2                | Year 3                | Year 4                | Year 5                | Year 6                | Year 1                     | Year 2                | Year 3                | Year 4                | Year 5                | Year 6                |
| Patients with NEDA, % (95% CI)                            | 0                         | 53<br>(39.2,<br>66.6) | 55<br>(41.1,<br>69.5) | 48<br>(33.8,<br>62.0) | 59<br>(44.5,<br>72.9) | 48<br>(32.5,<br>62.7) | 0                          | 38<br>(28.2,<br>47.4) | 41<br>(30.2,<br>52.5) | 49<br>(37.1,<br>60.2) | 54<br>(42.7,<br>65.4) | 58<br>(46.5,<br>70.4) |

<sup>a</sup>Proportions of patients free of MRI lesions or achieving NEDA are expressed as annual percentages within the relevant year. <sup>b</sup>NEDA was defined as absence of clinical disease activity (relapses and 6-month CDW) and MRI disease activity (new Gd-enhancing T1 and new/enlarging T2 hyperintense lesions). CARE-MS: Comparison of Alemtuzumab and Rebif Efficacy in Multiple Sclerosis; CDW: confirmed disability worsening; CI: confidence interval; Gd: gadolinium; NEDA: no evidence of disease activity.

**eTable 2.** Efficacy outcomes of early non-relapsers and early relapsers through 6 years.

| CARE-MS I<br>Early non-relapsers<br>(n=320)                    | (n=320)                 | (n=297)                 | (n=291)                 | (n=289)                 | (n=285)                 | CARE-MS I<br>Early Relapsers<br>(n=50)  |                        |
|----------------------------------------------------------------|-------------------------|-------------------------|-------------------------|-------------------------|-------------------------|-----------------------------------------|------------------------|
| CARE-MS II<br>Early non-relapsers<br>(n=330)                   | (n=329)                 | (n=306)                 | (n=304)                 | (n=289)                 | (n=279)                 | CARE-MS II<br>Early Relapsers<br>(n=78) |                        |
| Annual Assessments <sup>a</sup>                                | Year 1                  | Year 2                  | Year 3                  | Year 4                  | Year 5                  | Year 6                                  |                        |
| ARR, mean (95% CI)                                             | 0                       | 0.09<br>(0.06, 0.14)    | 0.14<br>(0.10, 0.19)    | 0.11<br>(0.08, 0.15)    | 0.12<br>(0.09, 0.17)    | 0.10<br>(0.07, 0.15)                    | 0.26<br>(0.15, 0.47)   |
|                                                                | 0                       | 0.16<br>(0.12, 0.22)    | 0.18<br>(0.14, 0.23)    | 0.20<br>(0.15, 0.26)    | 0.16<br>(0.12, 0.22)    | 0.15<br>(0.10, 0.21)                    | 0.15<br>(0.08, 0.28)   |
| Patients free of MRI disease activity, % (95% CI) <sup>b</sup> | 61<br>(55.7, 66.4)      | 78<br>(73.6, 82.9)      | 71<br>(66.0, 76.6)      | 70<br>(64.1, 75.0)      | 69<br>(63.8, 74.7)      | 65<br>(59.5, 71.0)                      | 69<br>(55.1, 83.0)     |
|                                                                | 63<br>(57.1, 67.9)      | 78<br>(72.9, 82.3)      | 70<br>(64.2, 74.9)      | 70<br>(64.2, 75.2)      | 67<br>(61.3, 72.9)      | 69<br>(63.2, 74.9)                      | 68<br>(56.3, 79.1)     |
| Yearly BPF change, median % (95% CI)                           | -0.57<br>(-0.75, -0.51) | -0.27<br>(-0.36, -0.18) | -0.19<br>(-0.29, -0.08) | -0.17<br>(-0.26, -0.08) | -0.18<br>(-0.31, -0.10) | -0.16<br>(-0.25, -0.09)                 | -0.24<br>(-0.39, 0.12) |
|                                                                | -0.49<br>(-0.58, -0.39) | -0.27<br>(-0.36, -0.19) | -0.12<br>(-0.27, -0.03) | -0.19<br>(-0.24, -0.06) | -0.01<br>(-0.11, 0.12)  | -0.10<br>(-0.19, 0)                     | -0.13<br>(-0.37, 0.02) |
| Patients with NEDA, % (95% CI) <sup>c</sup>                    | 59<br>(53.7, 64.6)      | 70<br>(64.8, 75.1)      | 63<br>(57.1, 68.4)      | 62<br>(56.6, 68.0)      | 63<br>(57.3, 68.7)      | 59<br>(52.8, 64.7)                      | 48<br>(32.5, 62.7)     |
|                                                                | 58<br>(52.9, 63.8)      | 64<br>(58.8, 69.5)      | 56<br>(50.2, 61.7)      | 56<br>(50.1, 62.0)      | 59<br>(53.1, 65.2)      | 60<br>(53.6, 66.0)                      | 58<br>(46.5, 70.4)     |

**eTable 2.** Efficacy outcomes of early non-relapsers and early relapsers through 6 years (continued).

| Cumulative Assessments                                  | Years 0–1          | Years 0–2          | Years 0–3          | Years 0–4          | Years 0–5          | Years 0–6          | Years 0–6          |
|---------------------------------------------------------|--------------------|--------------------|--------------------|--------------------|--------------------|--------------------|--------------------|
| Patients free of 6-month CDW, % (95% CI) <sup>d,e</sup> | 97<br>(93.8, 98.2) | 94<br>(91.0, 96.4) | 91<br>(86.6, 93.4) | 86<br>(81.5, 89.5) | 83<br>(77.7, 86.5) | 80<br>(75.1, 84.3) | 60<br>(45.0, 71.4) |
|                                                         | 94<br>(90.8, 96.3) | 91<br>(87.0, 93.6) | 86<br>(81.5, 89.4) | 80<br>(74.9, 84.0) | 78<br>(72.7, 82.1) | 75<br>(69.5, 79.4) | 60<br>(48.4, 69.3) |
| Patients with 6-month CDI, % (95% CI) <sup>d,f</sup>    | 17<br>(12.0, 23.2) | 27<br>(20.6, 33.8) | 30<br>(23.8, 37.5) | 32<br>(26.0, 40.0) | 36<br>(28.9, 43.2) | 36<br>(29.4, 43.8) | 24<br>(13.9, 40.6) |
|                                                         | 20<br>(15.0, 25.3) | 31<br>(25.3, 37.3) | 37<br>(30.7, 43.2) | 43<br>(36.8, 49.7) | 44<br>(38.2, 51.1) | 45<br>(39.1, 52.1) | 34<br>(24.4, 47.1) |

<sup>a</sup>ARR, proportions of patients free of MRI disease activity, yearly percentage BPF changes, and proportion of patients achieving NEDA are expressed as annual outcomes within the relevant year. <sup>b</sup>Freedom from MRI disease activity was defined as the absence of new Gd-enhancing T1 and new/enlarging T2 hyperintense lesions. <sup>c</sup>NEDA was defined as absence of clinical disease activity (relapses and 6-month CDW) and MRI disease activity (new Gd-enhancing T1 and new/enlarging T2 hyperintense lesions). <sup>d</sup>Kaplan-Meier estimates. <sup>e</sup>CDW is defined as ≥1-point EDSS increase (or ≥1.5 points if baseline EDSS = 0) confirmed over 6 months. <sup>f</sup>CDI is defined as ≥1-point EDSS decrease from baseline confirmed over 6 months (CDI is assessed only in patients with baseline EDSS score ≥2.0). ARR: annualized relapse rate; BPF: brain parenchymal fraction; CARE-MS: Comparison of Alemtuzumab and Rebif Efficacy in Multiple Sclerosis; CDI: confirmed disability improvement; CDW: confirmed disability worsening; CI: confidence interval; EDSS: Expanded Disability Status Scale; Gd: gadolinium; NEDA: no evidence of disease activity.
